# Supplementary material
Source: publisher figshare collection journal article supplement (https://sage.figshare.com/ndownloader/files/14144873)
Supplement: Supplementary file 1 [file 14144873]

## APPENDICES

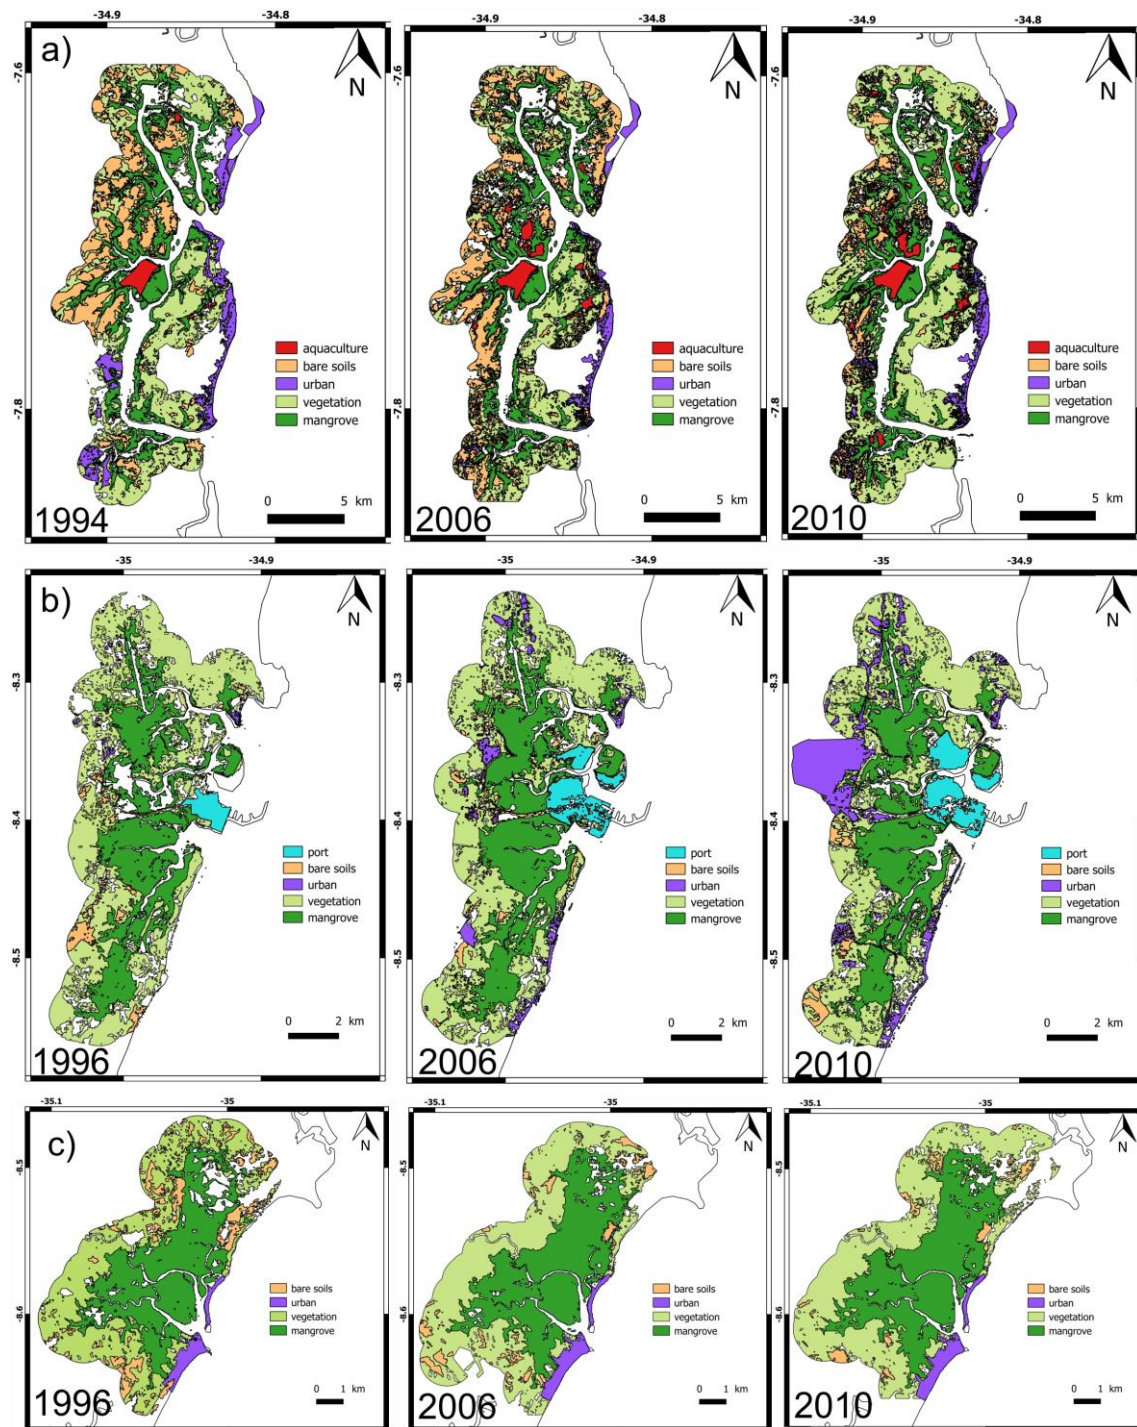

Appendix 1: Evolution of mangrove area and anthropic activities spatial occupation for the images that weren't presented in the results in a) the Santa Cruz Channel, b) Suape, c) Sirinhaém
